# Supplementary material
Source: MDPI journal article supplement (https://www.mdpi.com/2073-4441/15/2/371)
Supplement: s1 [file s1]

## A. QUESTIONNAIRE FOR HOUSEHOLD HEAD

**NB\*Tick or Fill in the spaces provided in the questionnaire**

Date

Questionnaire Number

Ward

Village

### Part A: Demographic Information

Q1. What is your gender?

1. Male ☐

2. Female ☐

Transgender ☐

Q2. What is your age group?

1. <18 ☐

2. 19 – 30 ☐

3. 31 – 40 ☐

4. 41 – 50 ☐

5. 51 – 60 ☐

6. 61+ Years ☐

Q3. What is the highest level of your education?

1. Never went to School ☐

2. Primary level ☐

3. Secondary level ☐

4. Diploma level ☐

5. University level ☐

Q4. Who is the head of this household?

1. Husband ☐

2. Wife ☐

3. Single Male headed ☐

4. Single Female headed ☐

5. Child headed ☐

6. Other: Specify.....

Q5. How many people live in this household?

1. <4 ☐

2. 5 – 7 ☐

3. 8 – 10 ☐

4. 11+ ☐

Q6. What is the main source of income for the family?

1. Formally employed ☐

3. Retired ☐

5. Farming ☐

2. Trader or vendor ☐

4. Remittances ☐

6. Other: Specify.....

Q7. Do you suffer from any chronic illness?

1. Yes ☐ 2. No ☐

Q8. If you answered 'Yes' above, which one? You can tick more than one.

1. Diabetes ☐ 3. High Blood Pressure ☐ 5. Arthritis ☐  
2. Asthma ☐ 4. Cancer ☐ 6. Fibrosis ☐  
7. Other: Specify.....

Q9. Do you have any disability?

1. Yes ☐ 2. No ☐

Q10. If you answered 'Yes' above, what form of disability do you have?

1. Physical disability ☐ 4. Visual impairment ☐  
2. Brain injury ☐ 5. Autism ☐  
3. Mental illness ☐ 6. Other: Specify.....

## PART B: Community participation and WASH issues

Q11. What is your source of water?

1. Private tap ☐ 5. Community tap ☐  
2. Private borehole ☐ 6. Community borehole ☐  
3. Protected well ☐ 7. Unprotected well ☐  
4. Pond or swamp ☐ 8. Other: Specify.....

Q12. What is the distance of your nearest water source?

1. < 0.5km ☐ 3. 1km – 1.5km ☐ 5. 2km+ ☐  
2. 0.5km – 1km ☐ 4. 1.5km – 2km ☐

Q13. How can you rate the quality of the water?

1. Very Good ☐ 2. Good ☐ 3. Poor ☐ 4. Don't know ☐

Q14. Do you treat the water before drinking?

1. Yes ☐ 2. No ☐

Q15. If you answered 'Yes' above, how do you treat it?

1. Filter with cloth ☐ 3. Boil ☐

2. Allow to settle ☐

4. Use Water Guard or Chlorine ☐

5. Other: Specify.....

Q16. During flood incidences how do you experience the following?

|                                                                       | Unlikely                 | Likely                   |
|-----------------------------------------------------------------------|--------------------------|--------------------------|
| 1. Lack of access to clean and safe drinking water                    | <input type="checkbox"/> | <input type="checkbox"/> |
| 2. Flooding and collapse of boreholes and wells                       | <input type="checkbox"/> | <input type="checkbox"/> |
| 3. Increased water salinity                                           | <input type="checkbox"/> | <input type="checkbox"/> |
| 4. Contamination of household items                                   | <input type="checkbox"/> | <input type="checkbox"/> |
| 5. Loss of household Non-Food Items (NFI)                             | <input type="checkbox"/> | <input type="checkbox"/> |
| 6. Collapse of latrines                                               | <input type="checkbox"/> | <input type="checkbox"/> |
| 7. Contamination of surface water                                     | <input type="checkbox"/> | <input type="checkbox"/> |
| 8. Ponding of water that provides breeding ground for disease vectors | <input type="checkbox"/> | <input type="checkbox"/> |
| 9. Outbreak of water and hygiene related diseases                     | <input type="checkbox"/> | <input type="checkbox"/> |

Q17. Which sanitation facility do you use?

1. Pit latrine ☐

2. Flush toilet ☐

3. Open space ☐

4. Other: Specify.....

Q18. How often do you practise open defecation?

1. Very Seldom ☐

2. Seldom ☐

3. Often ☐

4. Very Often ☐

5. Never ☐

Q19. Do you wash your hands after using a sanitation facility?

1. Yes ☐

2. No ☐

Q20. If you answered 'Yes' what do you use?

1. Soap ☐

2. Ashes ☐

3. Just water ☐

4. Other: Specify.....

Q21. Which of the following illnesses are common during and after flood incidences. Tick more than one.

1. Cholera ☐

2. Diarrhoea ☐

3. Typhoid ☐

4. Dysentery ☐

6. Bilharzia ☐ 6. Ring worms ☐ 7. Trachoma ☐ 8. Stomach problems ☐  
9. Other: Specify .....

Q22. Which Age group is easily affected by these illnesses?

1. 0 -5 ☐ 2. 6 - 10 ☐ 3. 11 – 20 ☐ 4. 21+Years ☐

Q23. How frequent is the Age group affected?

1. Very frequent ☐ 2. Frequent ☐ 3. Not very frequent ☐

Q24. Where do you get treatment for these illnesses?

1. Clinic ☐ 3. Traditional healer ☐  
2. Spiritual healer ☐ 4. Do not seek any help ☐  
5. Other: Specify.....

Q25. How accessible are health services and facilities?

1. Easily accessible ☐ 2. Not easily accessible ☐

Q26. If you answered not easily accessible above, what could be reason? You can tick more than one.

1. Long distance ☐ 2. Cost ☐ 3. No drugs ☐ 4. Understaffed ☐  
5. Other: Specify.....

Q27. Do you participate in the community water and sanitation programs?

1. Yes ☐ 2. No ☐

Q28. If you answered 'Yes' above, what is the nature of your participation? You can tick more than one answer.

1. Financial ☐ 2. Material provision ☐  
2. Manual labour ☐ 4. Mobilisation and sensitisation ☐  
5. Other: Specify.....

Q29. If you answered 'No' to Q27, what could be the reason?

1. Never consulted ☐ 3. Decisions are imposed ☐

2. Management is not accountable ☐ 4. Have my own source of water ☐  
5. Other: Specify .....

Q30. Who spearheads the ideas of water and sanitation in the community?

1. Villages ☐ 3. RDC ☐ 5. Government through DDF ☐  
2. NGOs ☐ 4. Religious bodies ☐ 6. Other: Specify.....

Q31. Rate the level of support from each of the following:

- |             | 1. Very Dissatisfied     | 2. Not Satisfied         | 3. Satisfied             | 4. Very Satisfied        |
|-------------|--------------------------|--------------------------|--------------------------|--------------------------|
| 1. RDC      | <input type="checkbox"/> | <input type="checkbox"/> | <input type="checkbox"/> | <input type="checkbox"/> |
| 2. DDF      | <input type="checkbox"/> | <input type="checkbox"/> | <input type="checkbox"/> | <input type="checkbox"/> |
| 3. NGOs     | <input type="checkbox"/> | <input type="checkbox"/> | <input type="checkbox"/> | <input type="checkbox"/> |
| 4. Churches | <input type="checkbox"/> | <input type="checkbox"/> | <input type="checkbox"/> | <input type="checkbox"/> |
